# Supplementary material for: Crystal structure of the NS3-like helicase from Alongshan virus
Source: PubMed Central journal article supplement (PMC7201283; doi:10.1107/s2052252520003632), 2020-04-10
Supplement: m-07-00375-sup1.pdf [file m-07-00375-sup1.pdf]

# IUCrJ

**Volume 7 (2020)**

**Supporting information for article:**

**Crystal structure of the NS3-like helicase from Alongshan  
virus**

**Xiaopan Gao, Kaixiang Zhu, Justyna Aleksandra Wojdyla, Pu Chen, Bo  
Qin, Ziheng Li, Meitian Wang and Sheng Cui**

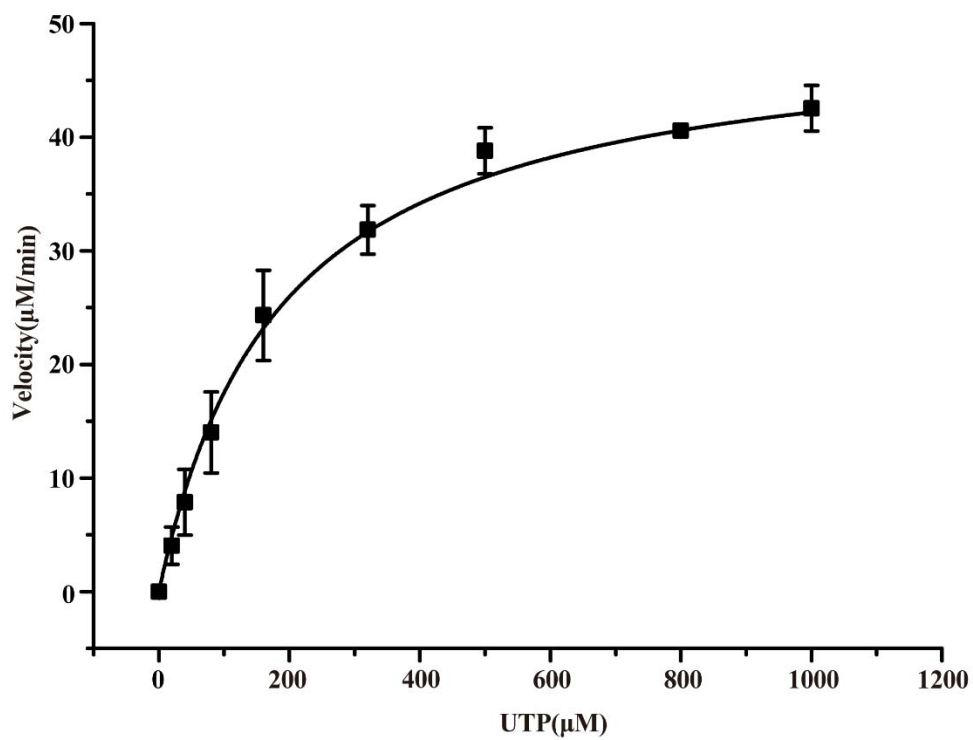

**Figure S1** UTP hydrolysis activity of ALSV-NS3-Hel. The velocity of UTP hydrolysis is plotted as the function of the concentration of UTP. The data was fitted using the Michaelis-Menten equation. Enzyme (ALSV NS3-Hel) concentration was 980nM.

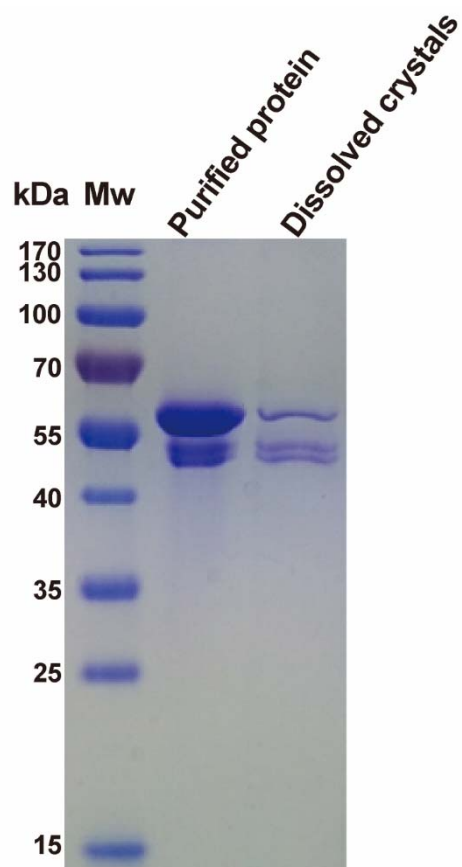

**Figure S2** SDS-PAGE analysis of ALSV NS3-Hel crystals. SDS-PAGE analysis of the finally purified ALSV NS3-Hel protein sample before crystallization trials and the crystals of ALSV NS3-Hel. Multiple crystals were transferred to fresh drops of crystallization buffer. The transfer continued from the first drop to the third drop to ensure the complete removal free proteins. The crystals were finally dissolved in SDS loading buffer, heat denatured and analyzed by SDS-PAGE.

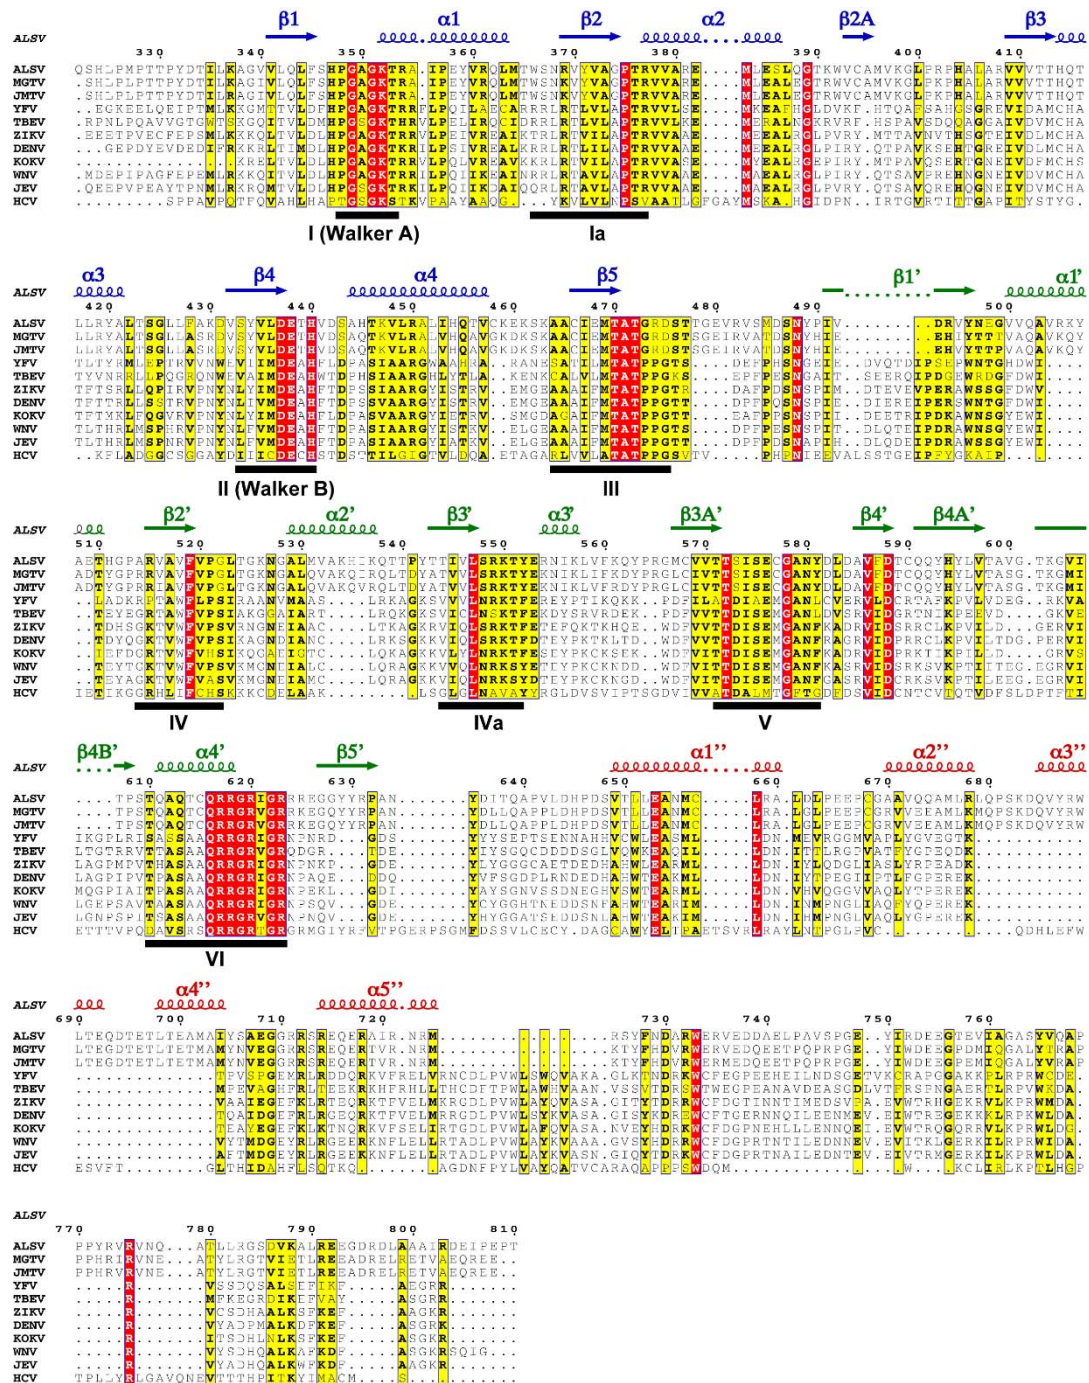

**Figure S3** Structure-based multiple sequence alignment of NS3 RNA helicases from unsegmented and segmented viruses. Amino acid sequences NS3 helicases from Yellow fever viirus (YFV), Tick-borne encephalitis virus (TBEV), Zika virus(ZIKV), Dengue virus(DENV), Kokobera virus (KOKV),West Nile virus(WNV), Japanese encephalitis virus (JEV) and Hepatitis C virus (HCV) were aligned with the sequence of the NS3-like helicases from the segmented viruses Mogiana tick virus (MGTV), Jingmen tick virus(JMTV) and Alongshan virus(ALSV) using by the software MUSCLE. Secondary structure elements of

ALSV NS3-Hel are indicated on top of the sequences using the ESPript server. Residues in with the red background indicate invariant residues; residues with the yellow background indicates the conserved residues. Conserved helicase motifs are indicated at the bottom of the sequences.

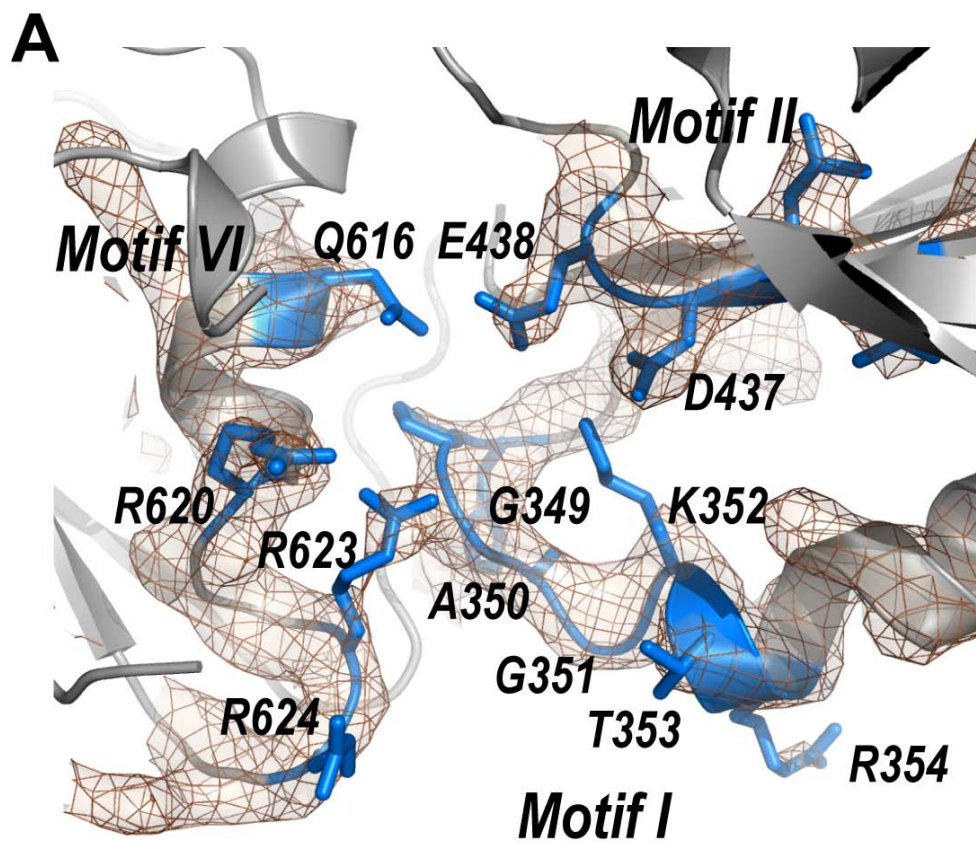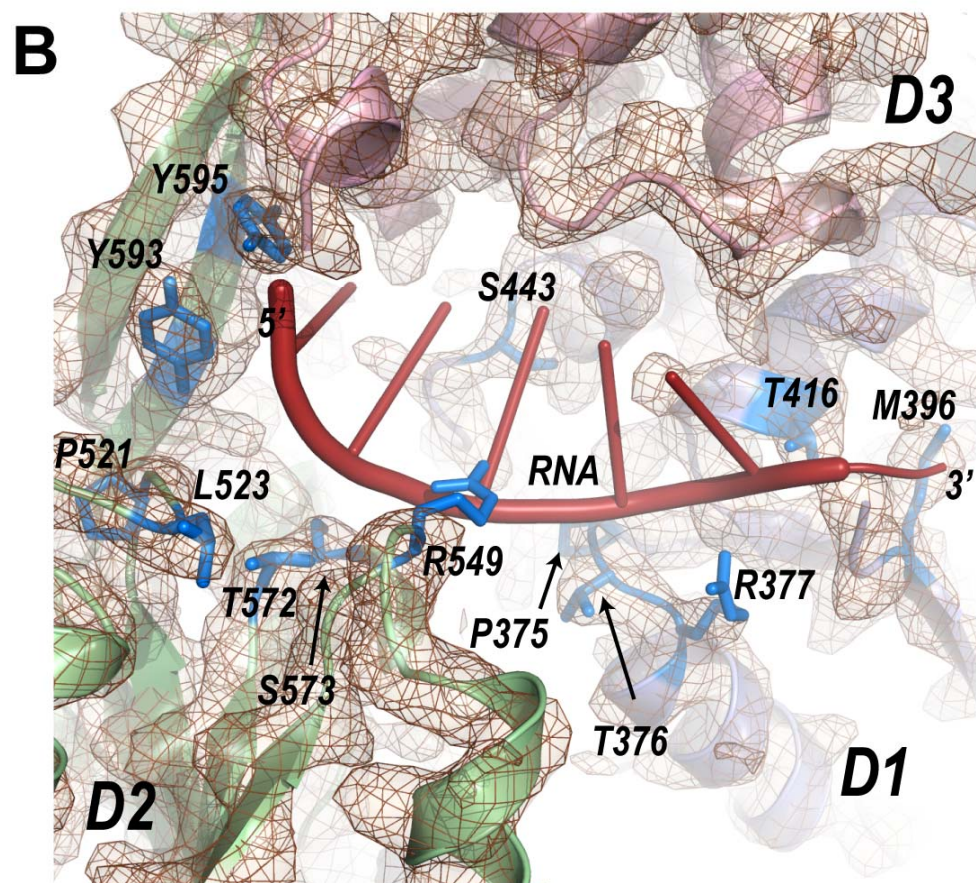

**Figure S4** Electron-density map of ATPase active site and putative RNA binding groove of ALSV NS3-Hel. (A) The active site of ALSV NS3-Hel shown with ribbon model and superimposed final 2Fo-Fc electron density map, contour 1.3  $\sigma$ . Invariant residues from Motif I, II and VI are shown in stick model, colored in blue. (B) Magnified view of the model of ALSV NS3-Hel-RNA complex with superimposed final 2Fo-Fc electron density map, contour 1.3  $\sigma$ . The color scheme is the same as in Figure 4C. Residues that were predicted to contact RNA are shown with the stick models

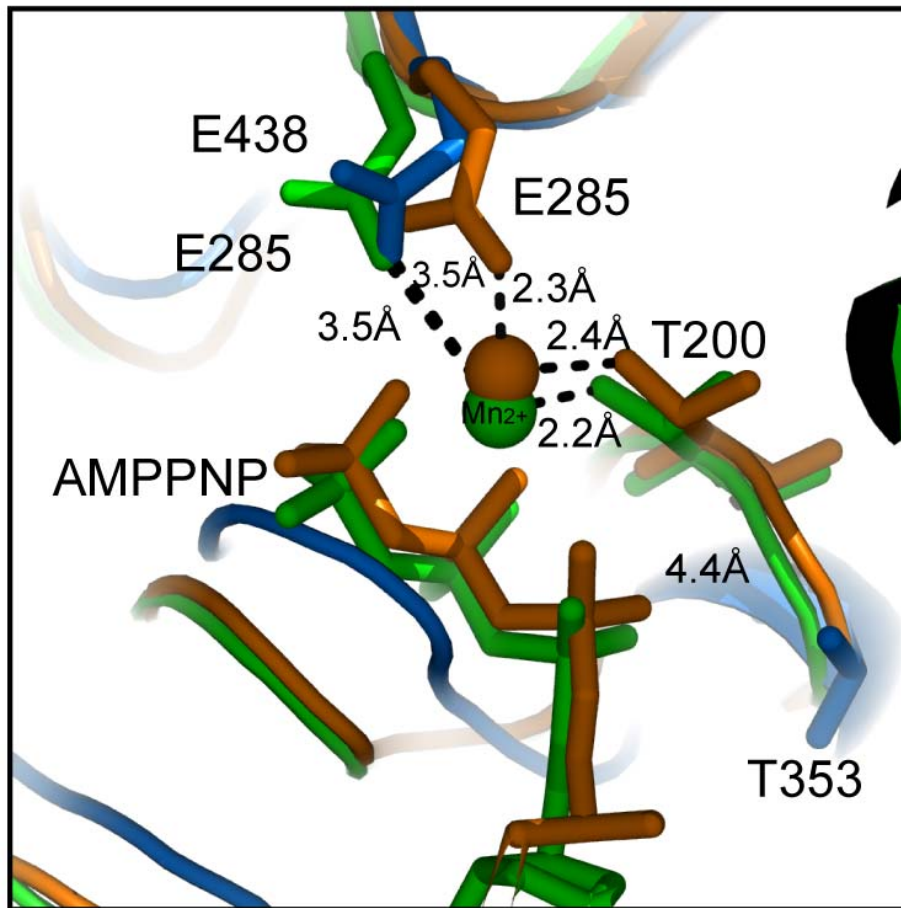

**Figure S5** Structural comparison of divalent ion coordination. The structure of ALSV NS3-Hel (blue) was superimposed with DENV NS3-Hel-AMPPNP-RNA complex (PDB ID:2JLV, green) and DENV NS3-AMPPNP complex (PDB ID:2JLR, orange). Residues participating in divalent ion coordination are shown with the stick models.



**Table S1** The enzymatic activities the NS3 helicase from various Flaviviridae virus

| <i>Virus</i>                                               | <b>Substrate</b>     |                           |                      |                           | <b>References</b>                 |
|------------------------------------------------------------|----------------------|---------------------------|----------------------|---------------------------|-----------------------------------|
|                                                            | <b>ATP</b>           |                           | <b>UTP</b>           |                           |                                   |
|                                                            | <i>K<sub>m</sub></i> | <i>K<sub>cat</sub></i>    | <i>K<sub>m</sub></i> | <i>K<sub>cat</sub></i>    |                                   |
| <i>Alongshan Virus</i><br>( <i>ALSV</i> )                  | 55.3±7.7μM           | 0.61±0.04 s <sup>-1</sup> | 185.43±18.94μM       | 0.85±0.02 s <sup>-1</sup> | This paper                        |
| <i>Dengue virus</i><br>( <i>DENV</i> )                     | 34±3μM               | 6.9s <sup>-1</sup>        |                      |                           | (Xu <i>et al.</i> ,<br>2005)      |
| <i>Kokobera virus</i><br>( <i>KOKV</i> )                   | 340μM                | 3.7 s <sup>-1</sup>       |                      |                           | (Speroni <i>et al.</i> ,<br>2008) |
| <i>Murray valley encephalitis virus</i><br>( <i>MVEV</i> ) | 190±30μM             | 5.5 s <sup>-1</sup>       |                      |                           | (Assenberg <i>et al.</i> , 2009)  |
|                                                            | 380±30μM             | 5.3 s <sup>-1</sup>       |                      |                           | (Mancini <i>et al.</i> , 2007)    |
| <i>Zika virus</i> ( <i>ZIKV</i> )                          | 191±26μM             | 2.3±0.1 s <sup>-1</sup>   |                      |                           | (Tian <i>et al.</i> ,<br>2016)    |
|                                                            | 89±11.2μM            | 1.18±0.05s <sup>-1</sup>  |                      |                           | (Yang <i>et al.</i> ,<br>2018)    |
| <i>Yellow fever viurs</i><br>( <i>YFV</i> )                | 210μM                | 2.9 s <sup>-1</sup>       | 190μM                | 2.5 s <sup>-1</sup>       | (Warrener <i>et al.</i> , 1993)   |
| <i>Japanese encephalitis virus</i><br>( <i>JEV</i> )       | 180μM                | 8.1 s <sup>-1</sup>       |                      |                           | (Kuo <i>et al.</i> ,<br>1996)     |
| <i>Hepatitis C virus</i><br>( <i>HCV</i> )                 | 59μM                 | 3 s <sup>-1</sup>         | 100μM                | 2 s <sup>-1</sup>         | (Suzich <i>et al.</i> ,<br>1993)  |

|  |                         |                             |  |  |                              |
|--|-------------------------|-----------------------------|--|--|------------------------------|
|  | $90 \pm 10 \mu\text{M}$ | $6.7 \pm 0.8 \text{s}^{-1}$ |  |  | (Jin &<br>Peterson,<br>1995) |
|--|-------------------------|-----------------------------|--|--|------------------------------|

**Table S2** Data collection and refinement statistics

|                                                                              | <b>ALSV NS3-Hel<br/>Se-Met crystal<br/>(PDB ID: 6M40)</b> |
|------------------------------------------------------------------------------|-----------------------------------------------------------|
| <b>Data collection</b>                                                       |                                                           |
| Space group                                                                  | P2 <sub>1</sub> 2 <sub>1</sub> 2 <sub>1</sub>             |
| Cell dimensions                                                              |                                                           |
| a, b, c (Å)                                                                  | 42.88, 58.68, 191.47                                      |
| $\alpha$ , $\beta$ , $\gamma$ (°)                                            | 90.00, 90.00, 90.00                                       |
| X ray source                                                                 |                                                           |
| Wavelength (Å)                                                               | 0.979144                                                  |
| Data range (Å)                                                               | 47.87-2.89                                                |
| Reflections unique                                                           | 20593 <sup>a</sup>                                        |
| $R_{\text{sym}}$ <sup>b</sup> (last shell)                                   | 0.179 (1.44)                                              |
| $I / \sigma I$ (last shell)                                                  | 9.68 (1.59)                                               |
| $CC(1/2)$                                                                    | 99.6 (74.9)                                               |
| Completeness (%) (last shell)                                                | 99.1 (96.4)                                               |
| Redundancy (last shell)                                                      | 7.05 (6.79)                                               |
| <b>Refinement</b>                                                            |                                                           |
| Resolution range (Å)                                                         | 47.87-2.89                                                |
| Reflections, cut-off, %<br>reflections in cross<br>validation                | 20578 <sup>a</sup> ,<br>1.33, 4.54                        |
| $R_{\text{work}}$ <sup>c</sup> / $R_{\text{free}}$ <sup>d</sup> (last shell) | 0.2463/0.2939 (0.3329/0.4049)                             |
| <b>Atoms</b>                                                                 |                                                           |
| Non-hydrogen protein<br>atoms                                                | 2993                                                      |
| Protein                                                                      | 2993                                                      |

|                                                                               |                   |
|-------------------------------------------------------------------------------|-------------------|
| Solvent                                                                       | 0                 |
| <i>B</i> -factors average (Å <sup>2</sup> )                                   | 86.10             |
| Protein (Å <sup>2</sup> )                                                     | 86.10             |
| Ligands (Å <sup>2</sup> )                                                     |                   |
| Solvent (Å <sup>2</sup> )                                                     |                   |
| <b>r.m.s.d</b>                                                                |                   |
| Bond lengths (Å)                                                              | 0.006             |
| Bond angles (°)                                                               | 0.819             |
| % residues in favored regions, allowed regions, outliers in Ramachandran plot | 91.91, 7.28, 0.81 |

<sup>a</sup> Friedel pairs are treated as different reflections

<sup>b</sup>  $R_{\text{sym}} = \sum_{\text{hkl}} \sum_j |I_{\text{hkl},j} - I_{\text{hkl}}| / \sum_{\text{hkl}} \sum_j I_{\text{hkl},j}$ , where  $I_{\text{hkl}}$  is the average of symmetry-related observations of a unique reflection

<sup>c</sup>  $R_{\text{work}} = \sum_{\text{hkl}} ||F_{\text{obs}}(\text{hkl})| - |F_{\text{calc}}(\text{hkl})|| / \sum_{\text{hkl}} |F_{\text{obs}}(\text{hkl})|$ .

<sup>d</sup>  $R_{\text{free}}$  = the cross-validation *R* factor for 5% of reflections against which the model was not refined.

**Table S3** Phasing Statistics of ALSV NS3-Hel crystal containing Se-Met.

|                                         |             |
|-----------------------------------------|-------------|
| <b>Compound</b>                         | Se          |
| <b>Number of sites</b>                  | 7           |
| <b>Figure-of-merit acentric/centric</b> | 0.294/0.138 |
| <b>Phasing power acentric</b>           | 0.957       |
| <b>R-Cullis for acentric</b>            | 0.835       |

**Table S4** Dali search of ALSV-NS3-Hel structure against PDB90 database<sup>a</sup> (top 10 Z-score hits).

| No. | Chain <sup>b</sup> | Z <sup>c</sup> | Rmsd (D1, D2, D3 )   | Iali <sup>d</sup> | nres <sup>e</sup> | %id <sup>f</sup> | Description                                                                    |
|-----|--------------------|----------------|----------------------|-------------------|-------------------|------------------|--------------------------------------------------------------------------------|
| 1:  | 2v6i-A             | 30.9           | 3.0 (2.0, 2.0, 3.9)  | 334               | 421               | 22               | MOLECULE:<br>RNA<br>HELICASE;                                                  |
| 2:  | 2Z83-A             | 28.9           | 3.3 (2.2, 2.0, N.D.) | 334               | 426               | 24               | MOLECULE:<br>HELICASE/NUC<br>LEOSIDE<br>TRIPHOSPHAT<br>ASE;                    |
| 3:  | 2wv9 -<br>A        | 28.7           | 3.2 (2.1, 1.9, N.D.) | 336               | 600               | 23               | MOLECULE:FL<br>AVIVIRIN<br>PROTEASE<br>NS2B<br>REGULATORY<br>SUBUNIT,<br>FLAV; |
| 4:  | 5yvu- B            | 28.5           | 3.2 (2.1 2.1, 3.7)   | 335               | 601               | 24               | MOLECULE:                                                                      |

|            |             |      |                      |     |     |    |                                                                  |
|------------|-------------|------|----------------------|-----|-----|----|------------------------------------------------------------------|
|            |             |      |                      |     |     |    | GENOME<br>POLYPROTEIN;                                           |
| <b>5:</b>  | 2bmf -B     | 28.2 | 3.1 (2.0, 2.0, N.D.) | 334 | 443 | 28 | MOLECULE:<br>NS3 HELICASE;                                       |
| <b>6:</b>  | 5jmt -A     | 27.8 | 3.2 (2.1, 2.3, N.D.) | 333 | 443 | 23 | MOLECULE:<br>RNA<br>HELICASE;                                    |
| <b>7:</b>  | 2qeq -A     | 27.3 | 3.1 (2.1, 2.0, 3.8)  | 327 | 415 | 25 | MOLECULE:FL<br>AVIVIRIN<br>PROTEASE NS3<br>CATALYTIC<br>SUBUNIT; |
| <b>8:</b>  | 1yks -A     | 26.8 | 3.3 (2.1, 2.5, 4.0)  | 330 | 431 | 21 | MOLECULE:<br>GENOME<br>POLYPROTEIN<br>[CONTAINS:<br>FLAVIVIRIN;  |
| <b>9:</b>  | 2qeq -B     | 25.0 | 3.1 (2.0, 1.9, 4.0)  | 311 | 391 | 23 | MOLECULE:<br>FLAVIVIRIN<br>PROTEASE NS3<br>CATALYTIC<br>SUBUNIT; |
| <b>10:</b> | 5wdx -<br>A | 22.8 | 4.5 (2.7, 2.6, N.D.) | 322 | 642 | 15 | MOLECULE:<br>JFH-1 NS3;                                          |

<sup>a</sup> PDB90 is a non-redundant subset of Protein Data Bank structures with less than 90% sequence identity to each other.

<sup>b</sup> PDB code and chain ID

<sup>c</sup> Dali Z-score

<sup>d</sup> The number of aligned C-alpha atoms

<sup>e</sup> The number of C-alpha atoms in the database structure

<sup>f</sup> Amino acids sequence identity

N.D. Not determined.

**Table S5** NS3 NTPase active site comparison between ZIKV and ALSV

| Motifs                                          | ALSV | ZIKV |
|-------------------------------------------------|------|------|
| Phosphates Motif I                              | G349 | G197 |
|                                                 | G351 | G199 |
| R-finger, motif VI                              | R623 | R462 |
| Base stabilization                              | R354 | R202 |
| Ribose recognition                              | N488 | N330 |
| Metal ion coordination                          | E438 | E286 |
|                                                 | T353 | T201 |
| Gamma phosphate (AlF <sub>3</sub> ) recognition | K352 | K200 |
|                                                 | E438 | E286 |
|                                                 | R620 | R459 |
|                                                 | R623 | R462 |
|                                                 | Q616 | Q455 |



**Table S6** . Prediction of ALSV NS3-Hel residues participating in RNA recognition.

| <i>ALSV NS3-Hel</i> | <i>Dengue 4 NS3-Hel</i><br>(PDB: 2JLV) | <i>Location</i> | <i>RNA recognition</i> |
|---------------------|----------------------------------------|-----------------|------------------------|
| *Y593               | P431                                   | D2              | base                   |
| *Y595               | L429                                   | D2              |                        |
| *S443               | D290                                   | D1              |                        |
| P521                | P363                                   | D2              | sugar 2'-OH            |
| *S573               | D409                                   | D2              |                        |
| P375                | P223                                   | D1              |                        |
| T416                | T264                                   | D1              |                        |
| *M396               | Q243                                   | D1              |                        |
| L523                | I365                                   | D2              | phosphate<br>backbone  |
| R549                | R387                                   | D2              |                        |
| T572                | T408                                   | D2              |                        |
| R377                | R225                                   | D1              |                        |
| T376                | T224                                   | D1              |                        |

\* residues not conserved in ALSV NS3-Hel.

## References

- Assenberg, R., Mastrangelo, E., Walter, T. S., Verma, A., Milani, M., Owens, R. J., Stuart, D. I., Grimes, J. M. & Mancini, E. J. (2009). *Journal of virology* **83**, 12895-12906.
- Jin, L. & Peterson, D. L. (1995). *Archives of biochemistry and biophysics* **323**, 47-53.
- Kuo, M. D., Chin, C., Hsu, S. L., Shiao, J. Y., Wang, T. M. & Lin, J. H. (1996). *The Journal of general virology* **77 ( Pt 9)**, 2077-2084.
- Mancini, E. J., Assenberg, R., Verma, A., Walter, T. S., Tuma, R., Grimes, J. M., Owens, R. J. & Stuart, D. I. (2007). *Protein science : a publication of the Protein Society* **16**, 2294-2300.
- Speroni, S., De Colibus, L., Mastrangelo, E., Gould, E., Coutard, B., Forrester, N. L., Blanc, S., Canard, B. & Mattevi, A. (2008). *Proteins* **70**, 1120-1123.

Suzich, J. A., Tamura, J. K., Palmer-Hill, F., Warrenner, P., Grakoui, A., Rice, C. M., Feinstone, S. M. & Collett, M. S. (1993). *Journal of virology* **67**, 6152-6158.

Tian, H., Ji, X., Yang, X., Zhang, Z., Lu, Z., Yang, K., Chen, C., Zhao, Q., Chi, H., Mu, Z., Xie, W., Wang, Z., Lou, H., Yang, H. & Rao, Z. (2016). *Protein & cell* **7**, 562-570.

Warrenner, P., Tamura, J. K. & Collett, M. S. (1993). *Journal of virology* **67**, 989-996.

Xu, T., Sampath, A., Chao, A., Wen, D., Nanao, M., Chene, P., Vasudevan, S. G. & Lescar, J. (2005). *J Virol* **79**, 10278-10288.

Yang, X., Chen, C., Tian, H., Chi, H., Mu, Z., Zhang, T., Yang, K., Zhao, Q., Liu, X., Wang, Z., Ji, X. & Yang, H. (2018). *FASEB J* **32**, 5250-5257.
